# Supplementary material for: A Human Lymph node-on-a-Chip for Personalized Evaluation of Vaccine Immunogenicity
Source: Research Square preprint supplement (doi:10.21203/rs.3.rs-8951191/v1), 2026-03-30
Supplement: Supplementary file 1 [file ddc301e46c14c7c785c096b0.pdf]

## Supplementary Information for

# **A Human Lymph node-on-a-Chip for Personalized Evaluation of Vaccine Immunogenicity**

**The Supplementary Information file includes:**

Supplementary Methods

Figs. S1 to S6

Tables. S1 to S4

## **I. Supplementary Methods**

### **Mesenteric lymph node tissue samples**

Human mesenteric lymph nodes were obtained from patients undergoing gastrointestinal surgery at NYU Langone Health. All procedures involving human tissues were approved by the Institutional Review Board at NYU, and were conducted in accordance with the principles of the Declaration of Helsinki. All participants provided written informed consent. To ensure compliance with the HIPAA regulations, all of the samples were deidentified before analysis. Briefly, human lymph nodes were dissected from mesenteric tissue immediately post-resection and transferred on ice to the laboratory. For histology analysis, human lymph node tissues were sectioned to 5  $\mu\text{m}$  thickness using a cryostat (Leica Biosystems) and immediately fixed in 4% paraformaldehyde (Alfa Aesar) for 15 minutes at room temperature. Fixed sections were washed with phosphate buffered saline (PBS, Thermo Fisher Scientific) and stored at 4 °C until subsequent immunostaining was performed within 24 hours. For scRNA-seq analysis, tissues were minced and or were enzymatically dissociated using Collagenase/Dispase (Sigma) for 30 minutes at 37 °C with gentle agitation. The dissociated cells then were filtered through a 70  $\mu\text{m}$  strainer (Corning), washed with cold PBS, then centrifuged at 300 $\times$ g for 8 minutes at 4 °C. The resulting cell suspensions were cryopreserved in freezing medium (Gibco) and stored in liquid nitrogen for subsequent scRNA-seq using the 10 $\times$  Genomics platform.

### **Immunofluorescence staining of lymph node tissue**

Fixed human lymph node tissue sections were permeabilized with 0.1% Triton X-100 (Sigma-Aldrich) in PBS for 15 minutes, and blocked with a blocking solution of 5% bovine serum albumin (BSA, Sigma) in PBS for 1 hour at room temperature. Sections were then incubated with the primary antibodies diluted in blocking solution overnight at 4°C. The following primary antibodies were used to identify different cell components in the lymph node tissues: anti-CD3e for T cell, anti-PAX5 for B cell, anti- $\alpha$ -smooth muscle actin ( $\alpha$ SMA) for lymphatic endothelial cell, anti-CD31 for endothelial cell, anti-CD163 for macrophage, anti-HLA-DR to label MHC class II<sup>+</sup> antigen-presenting cells, such as dendritic cells. After primary antibody incubation, sections were washed three times with PBS and then incubated with fluorophore-conjugated secondary antibodies for 1 hour at room temperature in the dark. Nuclei were counterstained with DAPI for

5 minutes, followed by another series of PBS washes. Slides were mounted with an anti-fade mounting medium (ProLong™ Gold Antifade Mountant, Thermo Fisher Scientific). Fluorescence images were acquired using a fluorescence microscope (Axio Observer 7; Carl Zeiss, Germany). Antibody sources and dilution information are provided in **Supplementary Table S4**.

### **Time-lapse tracking of T cell migration**

To visualizing the cell activities on chip, DCs, T cells, and FRCs were pre-labeled with DiO, DiD, and CellTrace Violet cell labeling solutions (Thermo Fischer Scientific), respectively. RFP expressing HUVECs (Angio-Proteomie) were used to form the HEVs on chip. After 5 days culture, phase contrast and fluorescence images of the chips were captured every 5 minutes over a 4-hour period using a 20x objective under an inverted microscope (Zeiss Axio Observer.Z1) equipped with an environmental control incubator (Okolab) at 37°C and 5% CO<sub>2</sub>. T cell motility were assessed by manually tracking individual T cells (>100 cells per condition) in ImageJ (NIH) using the Manual Tracking plugin.

### **Flow cytometry**

Human immune cells isolated from PBMCs or single-cell suspensions recovered from the chip with nattokinase (50 Fu/mL, NSK-SD, Pure Encapsulations) were analyzed by flow cytometry. For staining of human cell surface marker proteins, the cells were incubated on ice for 15 minutes in staining buffer (BioLegend) with fluorescently-labeled antibodies (BioLegend, details see **Supplementary Table S4**) based on the manufacturer's recommendations. Cells were washed three times and stained with 7-AAD (Thermo Fisher Scientific) to exclude dead cells, washed twice with flow cytometry washing buffer and resuspended in 200 µL of cell staining buffer for flow cytometric analysis using on FACSCanto™ Flow Cytometry (BD Biosciences). Subsequent analysis was done using FlowJo software version 10 (Treestar, BD Biosciences). The fluorescence calibration was adjusted by incubating respective antibodies with OneComp eBeads compensation beads (Invitrogen). Specifically, imDCs (CD11c<sup>+</sup>CD1a<sup>+</sup>), mDCs (CD11c<sup>+</sup>CD80<sup>+</sup>CD83<sup>+</sup>HLA-DR<sup>+</sup>), total B cells (CD3<sup>-</sup>CD19<sup>+</sup>), naïve B cells (CD19<sup>+</sup>CD27<sup>-</sup>CD38<sup>-</sup>), pre-GC B cells (CD19<sup>+</sup>CD27<sup>-</sup>CD38<sup>+</sup>), GC B cells (CD19<sup>+</sup>CD27<sup>+</sup>CD38<sup>+</sup>), memory B cells (CD19<sup>+</sup>CD27<sup>+</sup>CD38<sup>-</sup>), plasma cells (CD19<sup>+</sup>CD27<sup>+</sup>CD38<sup>++</sup>) were identified by selecting living cells that tested positive for these surface markers in flow cytometry analyses.

### **Quantification of B cell subsets by CD27 and CD38 expression**

To track B cell differentiation in response to vaccination, the lymph node chips were fixed at defined time points and stained with CD27 and CD138 to distinguish different B cell subsets. All fixed chips were immunostained simultaneously on the same day under identical antibody concentrations, incubation times, and imaging conditions to ensure consistency across chips. Confocal microscopy was performed using uniform laser power, gain, and exposure settings to enable direct comparison of fluorescence intensities. B cell subsets were distinguished using CD27 and CD138 to identify memory and plasma cells. For further characterization of B cell maturation, CD27 and CD38 staining was used to define naïve B cells (CD27<sup>-</sup>CD38<sup>-</sup>), pre-GC B cells (CD27<sup>-</sup>CD38<sup>+</sup>), GC B cells (CD27<sup>+</sup>CD38<sup>+</sup>), memory B cells (CD27<sup>+</sup>CD38<sup>-</sup>), and plasma cells (CD27<sup>+</sup>CD38<sup>++</sup>). B cells were identified as CD19<sup>+</sup> populations, while CD19<sup>-</sup> cells in the same field of view were used as internal negative controls for background signal estimation. To allow consistent comparison across time, fluorescence intensities from CD19<sup>+</sup> B cells and CD19<sup>-</sup> collected at all time points were pooled to establish unified thresholds for CD27 and CD38 expression. The mean and standard deviation of CD27 and CD38 fluorescence intensities were calculated from pooled CD19<sup>+</sup> cells across all time points. Cells were categorized as CD27<sup>+</sup> or CD38<sup>+</sup> based on thresholds exceeding the pooled CD27 mean or CD38 mean, respectively, and as CD38<sup>++</sup> if exceeding the mean plus two standard deviations. Scatter plots of CD27 vs. CD38 were generated for each time point to visualize subset distributions. The percentage of cells within each subset gate was quantified using Matlab R2024b.

### **Antibody detection by multiplex influenza immunoassay**

To assess influenza-specific antibody secretion levels in on-chip cultures and matched clinical serum samples, we used a custom-designed, bead-based multiplex antigen binding assay on the Luminex™ platform, which we ran in a 26-plex comprising 23 recombinant HA and NA antigens derived from historical and concurrent influenza A and B virus strains, complemented with Rubella Virus E1/E2 (ACROBiosystems) and BSA (Fisher Scientific) negative control antigens, as well as IC45 uncoupled, autofluorescing positive control beads (Luminex, MagPlex RP1 Monitor beads) (**Supplementary Table 2**). Recombinant HA and NA proteins were obtained from commercial sources (Sino Biological or, for clade 2.3.4.4b H5 and N1 antigens, from BEI Resources) and coupled to magnetic, fluorescently labeled MagPlex microsphere beads (Luminex)

10-100 pmol per 10<sup>6</sup> beads using the xMAP Antibody Coupling Kit (Luminex), which utilizes carbodiimide coupling to primary amines of the antigens. Culture supernatants were collected from each chip on day 10 post-vaccination, matched serum samples from the same donors were collected before vaccination and approximately one month after influenza vaccination. Samples were stored at -80 °C and were thawed on ice before analyses.

Coupling was confirmed using a positive control serum pool from the NYU Langone Vaccine Center Biorepository and a biotinylated rabbit anti-human IgG (H+L) detection antibody (Abcam) at a concentration of 2 µg/mL. All influenza antigens were His-tagged, and coupled beads were additionally confirmed using a biotinylated anti-His antibody (Abcam) at a 1:2000 dilution. These antibodies were also used to confirm the absence of cross-reactive antibody responses to the antigens in multiplex (all antigens in a single well) versus singleplex (only one antigen per well) measurements. Sera were heat-inactivated at 56°C for 30 minutes, then incubated with multiplexed, antigen-coupled beads in PBS with 0.01% BSA (Sigma-Aldrich) and 0.02% Tween-20 (Sigma-Aldrich) for one hour at room temperature in the dark with shaking at 800 rpm. Serum samples were analyzed at final dilutions of 1:100 and 1:2000. Beads were rinsed twice in PBS-TB using a plate magnet and subsequently incubated for 30 minutes at room temperature with the biotinylated rabbit anti-human IgG (H+L) detection antibody, followed by incubation with 4 µg/mL streptavidin-PE for 30 minutes under the same conditions. After final rinsing, beads were resuspended in PBS-TB and analyzed using a Luminex 200 instrument with standard settings. To correct each sample for unspecific binding to beads, we normalized the data using the IC45 bead reading. The final binding area under the curve (AUC) was calculated by summing median fluorescence intensities (MFIs) from both dilutions. Batch normalization was done for each antigen using the average signals obtained with the positive control pool. These corrections reduced technical variability while preserving biological trends.

To specifically evaluate responses to vaccine-matched strains, we focused on the four HA antigens corresponding to the 2022–2023 seasonal influenza vaccine formulation: A/Wisconsin (H1N1), A/Darwin (H3N2), B/Austria (B/Victoria lineage), and B/Phuket (B/Yamagata lineage). Fold change in IgG response was computed for each donor by dividing the post-vaccination signal by the corresponding pre-vaccination baseline.

### **Scanning electron microscopy**

To facilitate downstream sectioning for SEM imaging, the bottom glass substrate of the lymph node chip was replaced with a 2 mm-thick PDMS layer during device fabrication. On day 10 post-vaccination, chips were washed three times with PBS (10 minutes each wash) and fixed in 10% neutral buffered formalin (4% formaldehyde, 1% methanol in phosphate buffer; Electron Microscopy Sciences) at 4 °C for 3 hours. Fixed chips were washed again three times with PBS (10 minutes each wash) and sectioned into 2 mm-thick slices. Samples were dehydrated through a graded ethanol series (30%, 50%, 70%, 80%, and 90%; Cat#E7023, Sigma-Aldrich) for 10 minutes each, followed by three incubations in 100% ethanol for 20 minutes each. Dehydrated sections were subjected to critical point drying using a critical point dryer (Tousimis Samdri-931). Samples were mounted onto SEM stub with carbon tape (Electron Microscopy Sciences) and sputter-coated with gold for 30 seconds (~15 nm thickness) in a sputter coater (108 Auto, Cressington Scientific Instruments). Imaging was performed using a variable pressure SEM (S-3400N, Hitachi High-Technologies) under high vacuum at 15 kV.

### **scRNA-seq analysis**

For scRNA-seq analysis, single-cell suspensions were generated from freshly thawed PBMCs, human lymph node tissue, or recovered from the lymph node chips treated with human seasonal influenza vaccines for 10 days or left untreated (designated as Vaccine and None) using nattokinase (50 Fu/mL, NSK-SD, Pure Encapsulations). Different batches of single-cell suspensions were pre-labeled with different anti-human hashtag antibodies (TotalSeq, BioLegend), i.e., Hashtag5- AAGTATCGTTTCGCA, Hashtag6-GGTTGCCAGATGTCA, Hashtag7-TTCCGCCTCTCTTTG, Hashtag8-AGTAAGTTCAGCGTA, all at 1:250 dilution and mixed into one sample. Cells were barcoded using TotalSeq-A hashtag antibodies, pooled, and processed with the Chromium Single Cell 3' v3 platform (10x Genomics). Libraries were sequenced on an Illumina NovaSeq 6000.

The raw reads from the 10x Genomics platform were processed in the CellRanger pipeline (version 6.1.2) with hg38/GRCh38 as the reference genome for read alignment. Further analyses including quality control and data filtering, the identification of highly variable genes, dimensionality reduction, standard unsupervised clustering algorithms, and the discovery of differentially expressed genes were performed using the R package Seurat (version 4.2.1/5.0).

Hashtag demultiplexing was performed using Seurat's HTODemux (positive.quantile = 0.99), assigning each cell to Hashtag 5, Hashtag 6, Hashtag 7, or Hashtag 8 and removing multiplets and negatives. Gene expression data were analyzed using Seurat (v5.0, R v4.2.1). Samples were integrated using PCA-based anchors (dims = 1:30), or alternatively mapped to Hashtag 7 (vaccinated chip) via label transfer (MapQuery). Differentially expressed genes between clusters or hashtags were identified using Wilcoxon tests (Bonferroni-adjusted  $p < 0.05$ ,  $\log_2FC > 0.25$ ), and functional annotation was performed with clusterProfiler (v4.4.4). Cell types were annotated using canonical markers and reference datasets. Lineage-specific trajectories were reconstructed with Monocle 3 (v1.2.9). All analyses were performed in R (v4.2.1).

For inter-donor comparisons, cells from defined immune lineages were aggregated into donor-level pseudobulk profiles and analyzed using edgeR to identify differentially expressed genes, which were visualized as z-score-scaled heatmaps with hierarchical clustering. Pathway activity was assessed by gene set enrichment analysis (GSEA) using MSigDB Hallmark pathways, including MYD88 and IL2-STAT5 signaling, in a cell-type-resolved manner and summarized as dot plots. In addition, enrichment of APRIL-TACI signaling was evaluated using a custom gene set (TACI\_SIGNALING\_CORE; TNFRSF13B, TNFSF13, TNFSF13B, TRAF2, TRAF3, TRAF6, BIRC3, MAP3K14, NFKB1, NFKB2, RELA, RELB, NFKBIA, PIK3CD, PIK3R1, AKT1, and MTOR) and visualized using donor-level GSEA enrichment curves.

## II. Supplementary Figures

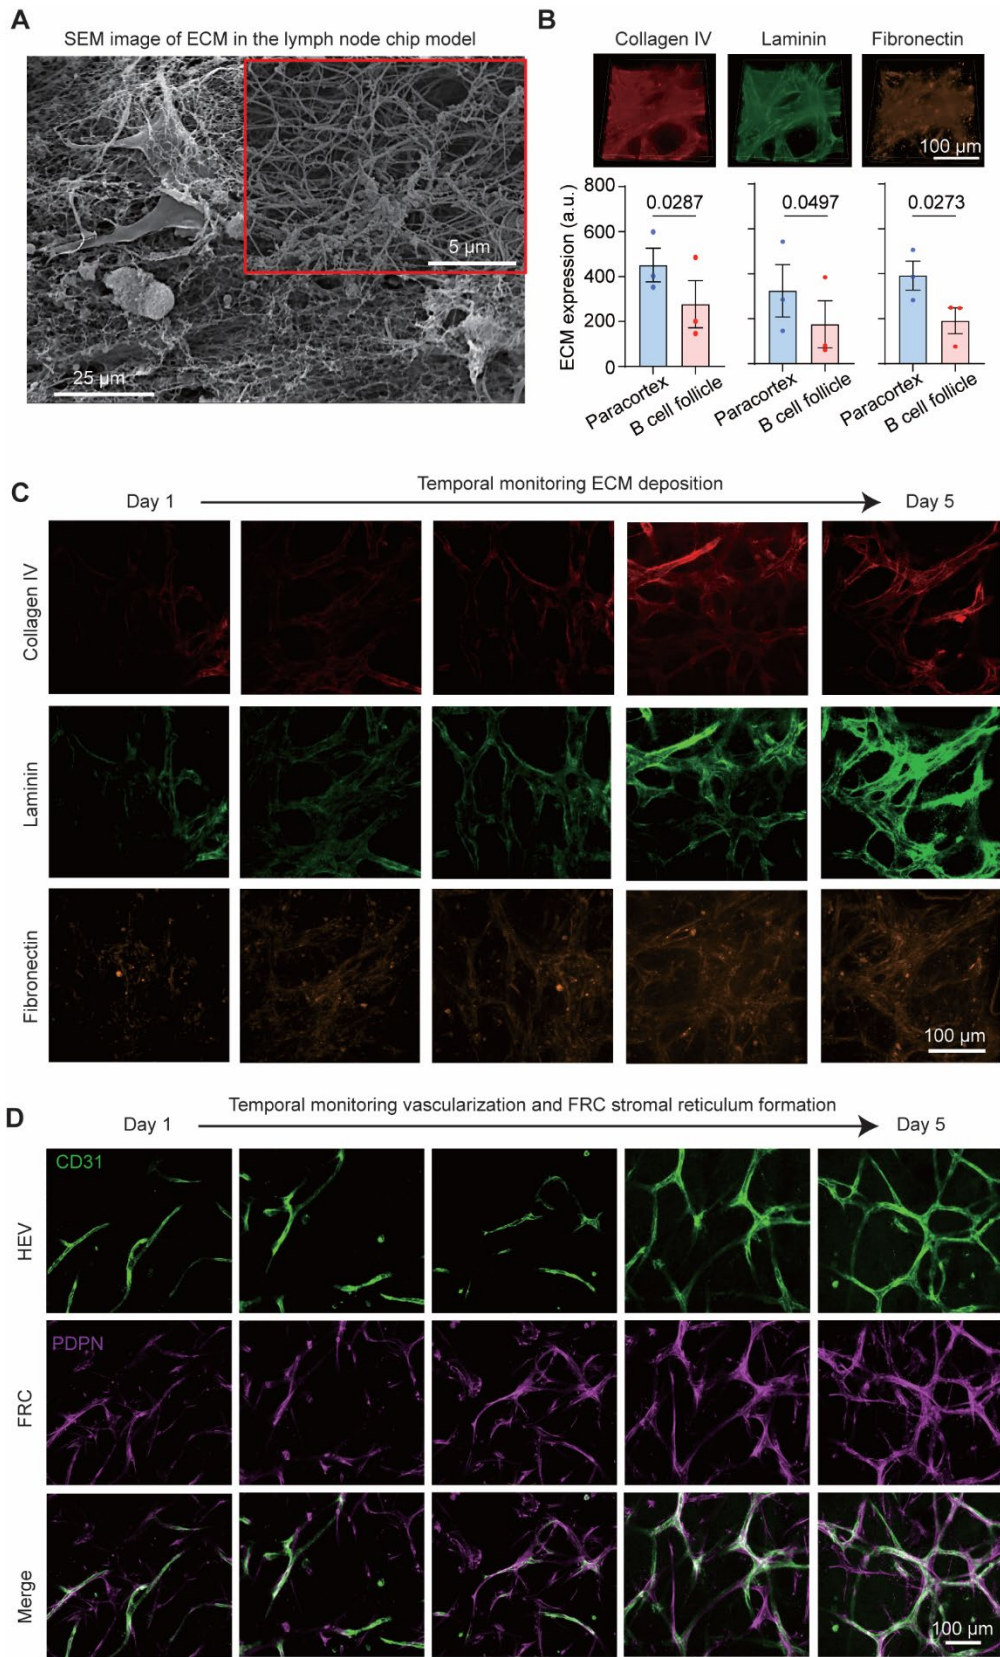

**Fig. S1. ECM and stromal reticulum formation in the LN-on-a-chip.** (A) Representative SEM images showing ECM in the lymph node chip model showing a dense, fibrillar matrix that supports 3D cellular organization. The magnified inset highlights the nanoscale fibrous ECM network. (B) Representative immunofluorescence images and quantification of ECM proteins (collagen IV, laminin, fibronectin) in the paracortical and B cell follicular regions of the lymph node chip on day 10. ECM deposition was significantly higher in the paracortex than the B cell follicle, suggesting stromal network heterogeneity. (C) Time-lapse confocal imaging showing progressive accumulation of Collagen IV, Laminin, and Fibronectin within the stromal reticulum from day 1 to day 5 (identical imaging settings across time points). (D) Time-lapse confocal imaging showing the progressive formation of CD31<sup>+</sup> vascular and PDPN<sup>+</sup> FRC networks and alignment within the paracortical region.

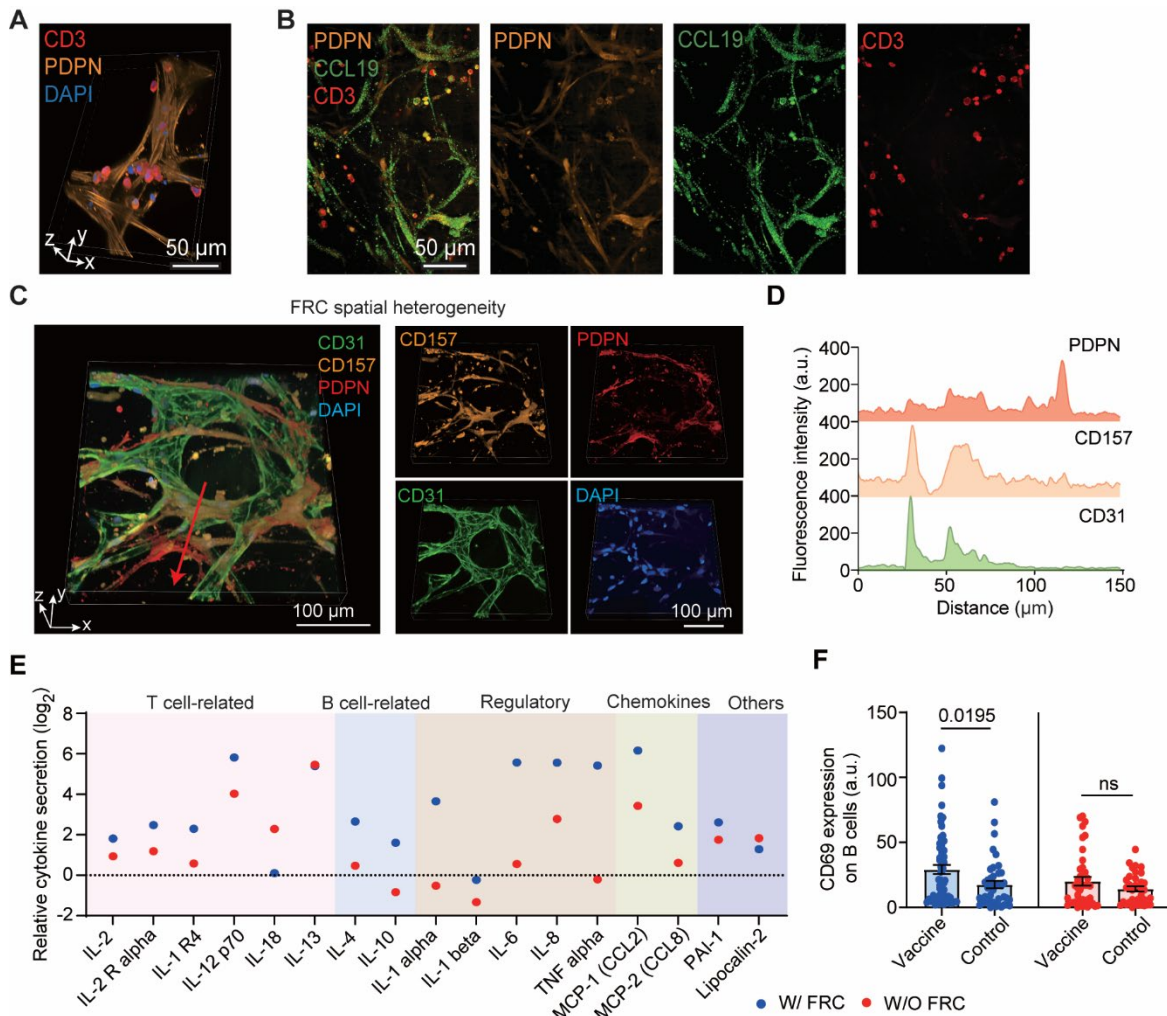

**Fig. S2. FRC network supports T cell localization and activation on chip.** (A) Representative immunofluorescence 3D reconstruction images showing CD3<sup>+</sup> T cells in close proximity to the PDPN<sup>+</sup> FRC network within the paracortex. Nuclei, DAPI. (B) Immunofluorescence images showing CCL19 localized along the PDPN<sup>+</sup> FRC scaffold adjacent to CD3<sup>+</sup> T cells, demonstrating chemokine-mediated guidance of T cell positioning. For A-B, images were taken on day 10. (C) Immunofluorescence 3D reconstruction images of stromal architecture on day 5 reveals spatial heterogeneity of FRC subsets. Classical PDPN<sup>+</sup> FRCs and CD157<sup>+</sup> vascular-associated FRCs are organized in distinct niches relative to CD31<sup>+</sup> vasculature. (D) Fluorescence intensity profile along the red arrow in (C) path quantifies the spatial distribution of PDPN, CD157, and CD31. For C-D, images were taken on day 7. (E) Cytokine secretion profiles in chips with (blue) or without (red) FRCs on day 10, measured using the Human Immune Response Array C1. Log<sub>2</sub>-fold changes show enhanced secretion of T cell-related, B cell-related, regulatory, and chemokine cytokines in the presence of FRCs. (F) Comparison of B cell activation levels (CD69) after vaccination with control group on day 10, with or without FRCs (3 independent chips per condition).

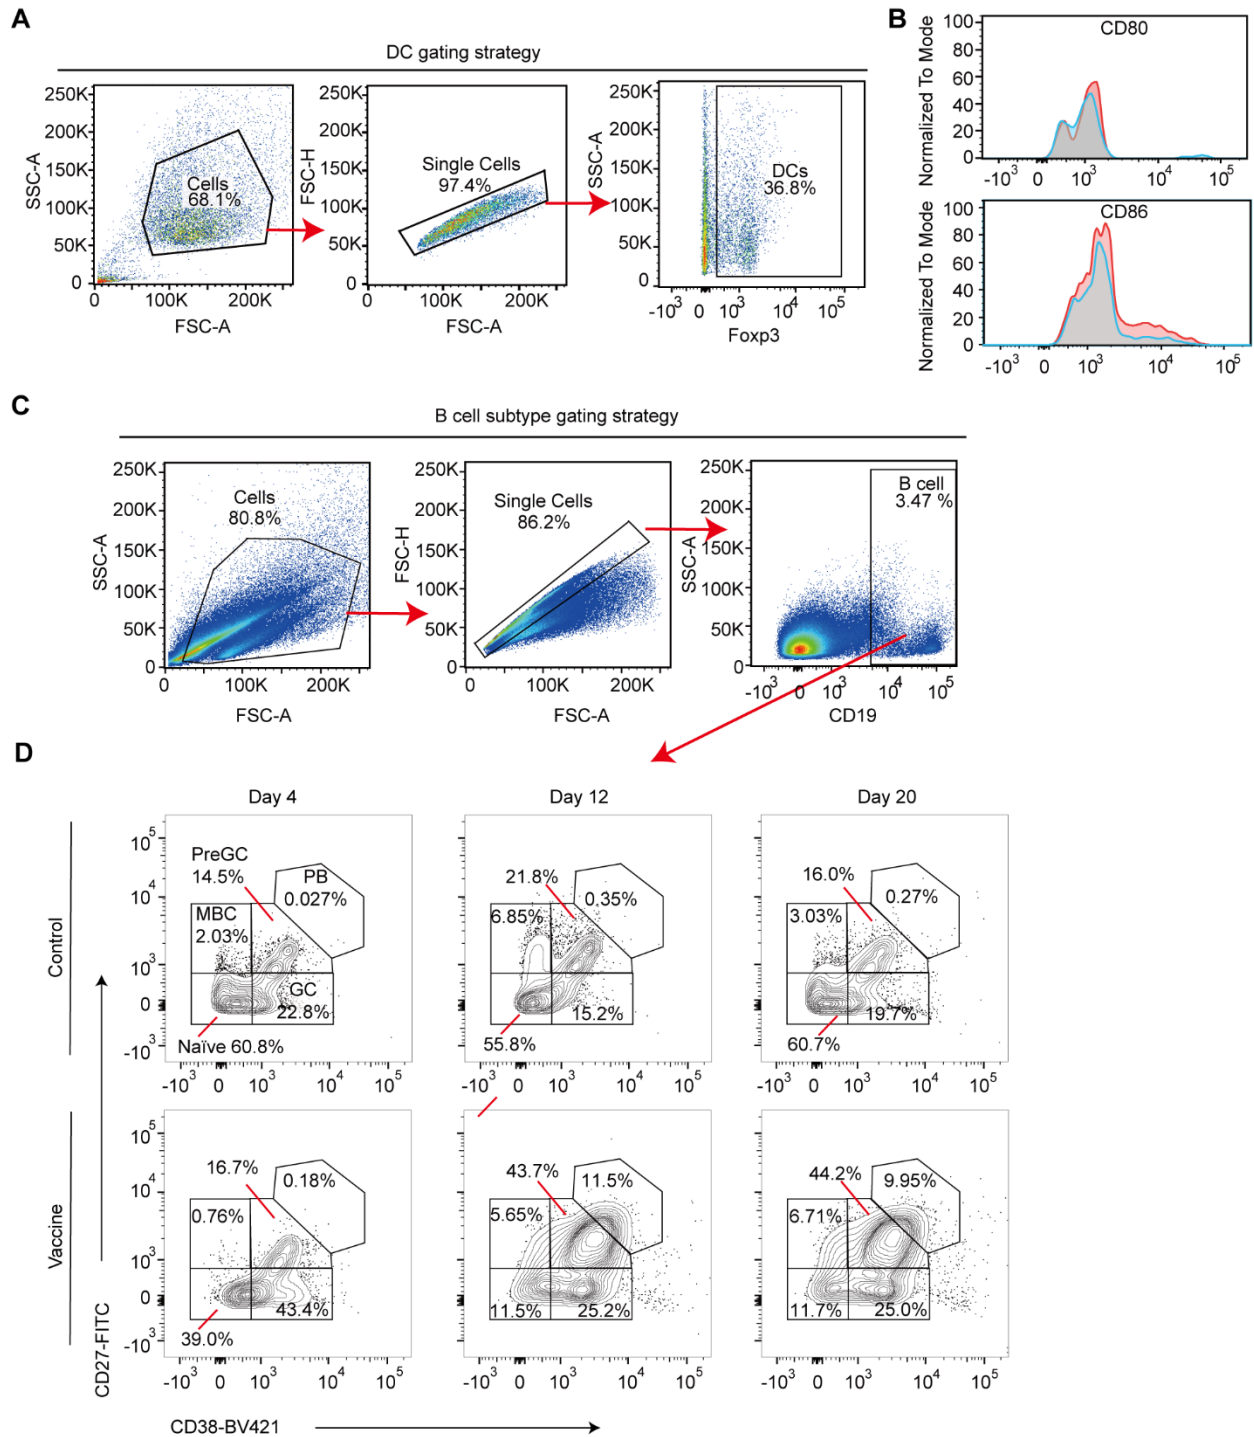

**Fig. S3. Characterization of DCs and B cell subsets recovered from LN-on-a-chip cultures by flow cytometry.** (A) Representative flow cytometry gating strategy for isolating live single cells recovered from LN-on-a-chip cultures. Forward scatter (FSC-A/H) and side scatter (SSC-A) parameters were used to select viable single-cell populations for downstream analysis. (B) Histogram plots showing expression of DC activation markers CD80 and CD86 on chip-derived DCs. Data are normalized to mode fluorescence intensity. (C) Gating strategy for B cell subset identification using cells collected from LN-on-a-chip cultures. (D) Representative flow cytometry

plots showing B cell subset distribution in control and vaccine-stimulated LN-on-a-chip conditions on day 12. CD19<sup>+</sup> B cells were further subdivided based on CD27 and CD38 expression into naïve (CD27<sup>-</sup>CD38<sup>-</sup>), pre-GC (CD27<sup>-</sup>CD38<sup>+</sup>), GC (CD27<sup>+</sup>CD38<sup>+</sup>), memory (MBC, CD27<sup>+</sup>CD38<sup>-</sup>), and plasmablast (PB, CD27<sup>+</sup>CD38<sup>++</sup>) populations. Percentages indicate the relative frequency of each B cell subset among total CD19<sup>+</sup> cells.

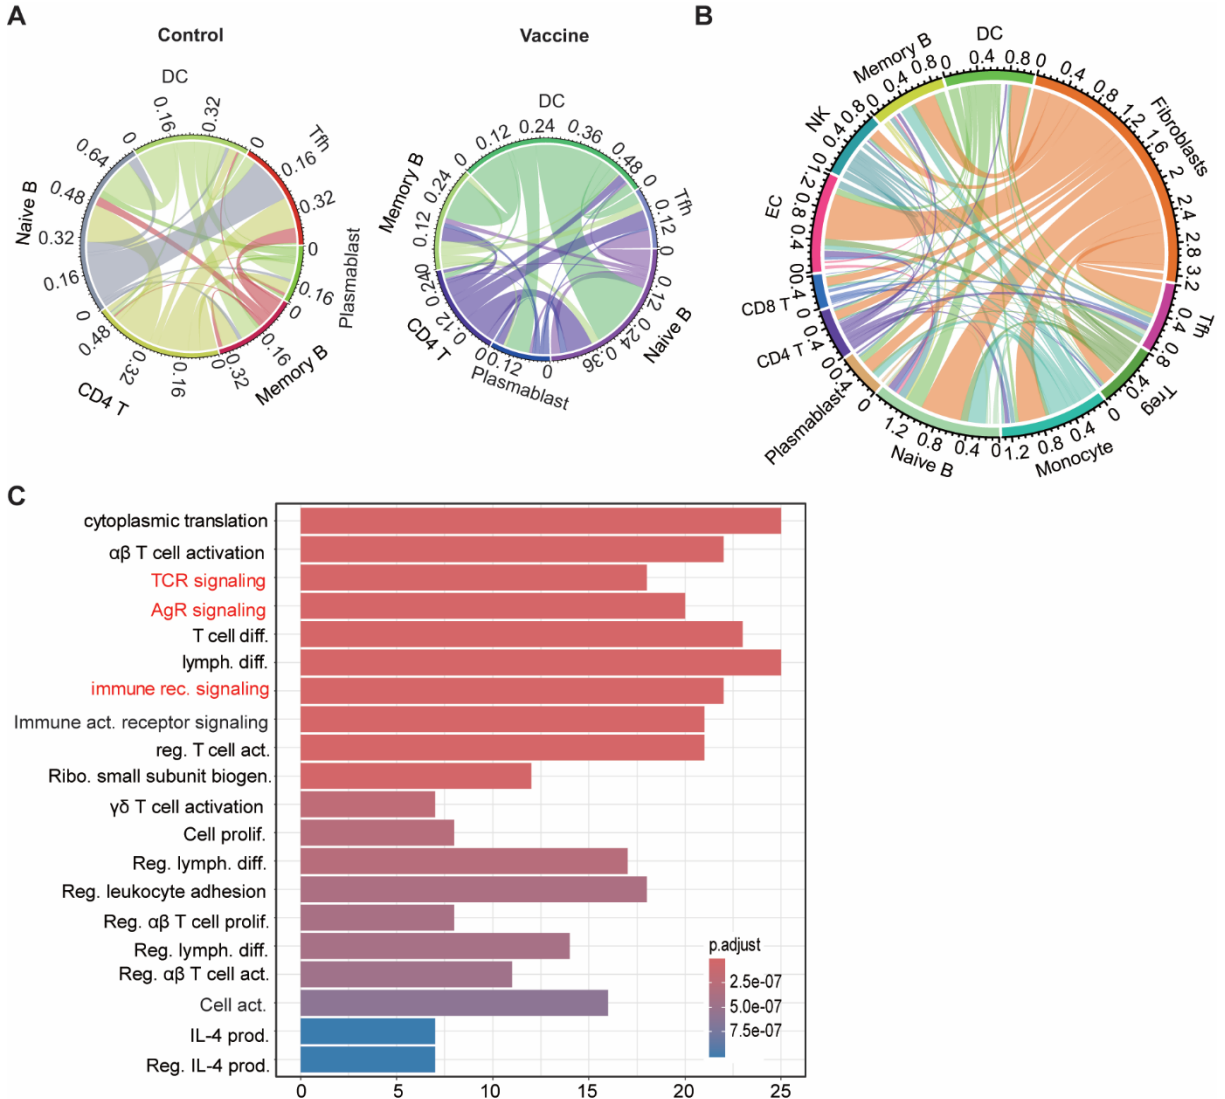

**Fig. S4. Vaccine-induced remodeling of intercellular communication networks and functional gene enrichment.** scRNA-seq was performed on cells harvested from LN-on-a-chip cultures on day 10 with and without vaccination. **(A)** Chord diagrams of the four selected ligand–receptor pairs (CCL3–CCR1, SPP1–CD44, CD6–ALCAM, FN1–ITGA4/ITGB1) across all final\_cell\_type groups, for Control (left) and Vaccine (right). Arc segments represent cell types defined by final\_type; chord thickness scales with interaction strength ( $p.adjust < 0.05$ ,  $mean > 0.35$ ). **(B)** Representative global cell–cell communication diagram summarizing significant interactions among all annotated cell types (see Methods for aggregation). Outer scales indicate cumulative interaction strength per cell type; chord width reflects relative interaction probability. **(C)** Gene Ontology (Biological Process) enrichment of vaccine-induced genes. Bars show the top terms ranked by gene count; color encodes adjusted p values.

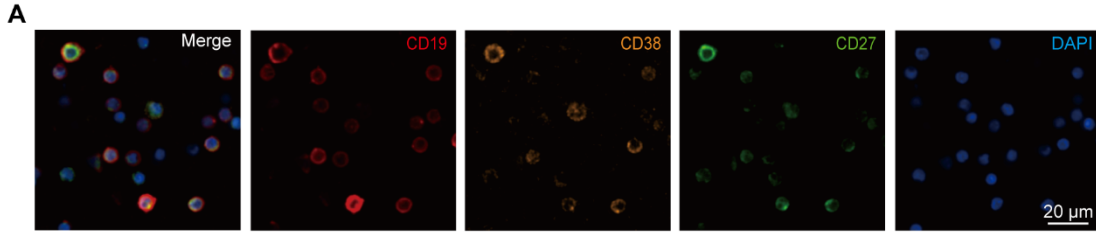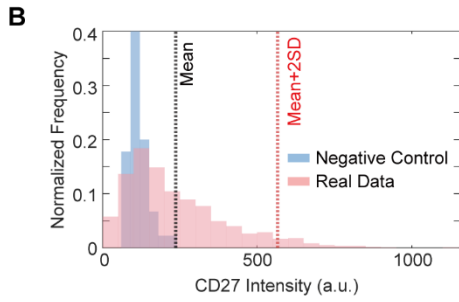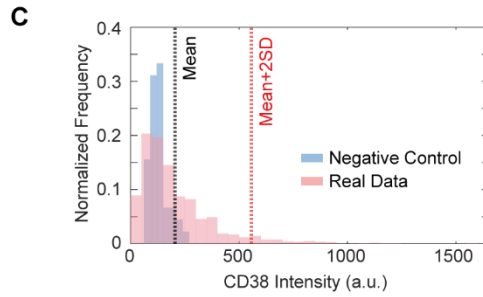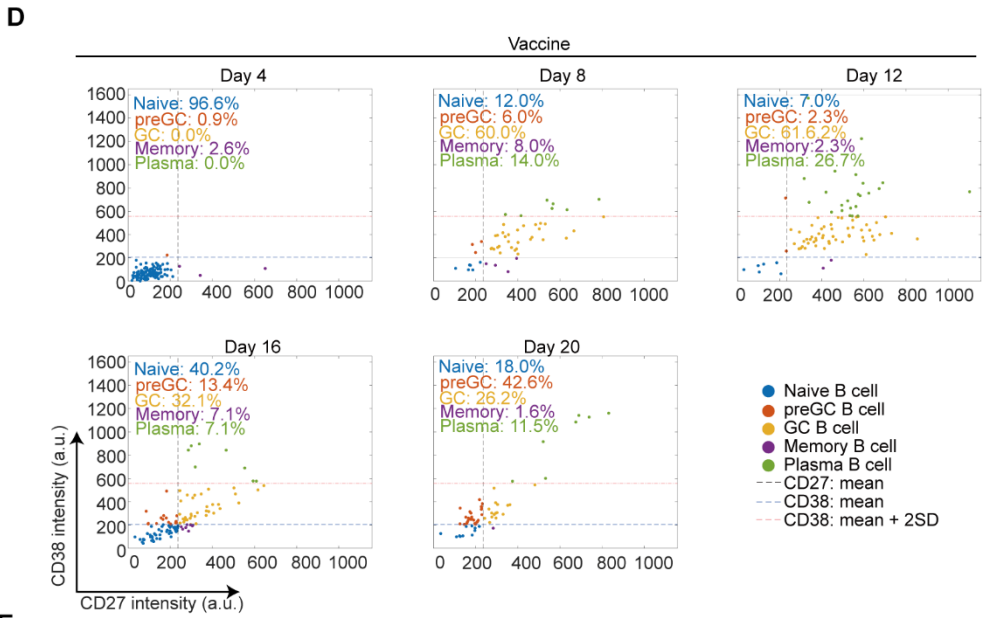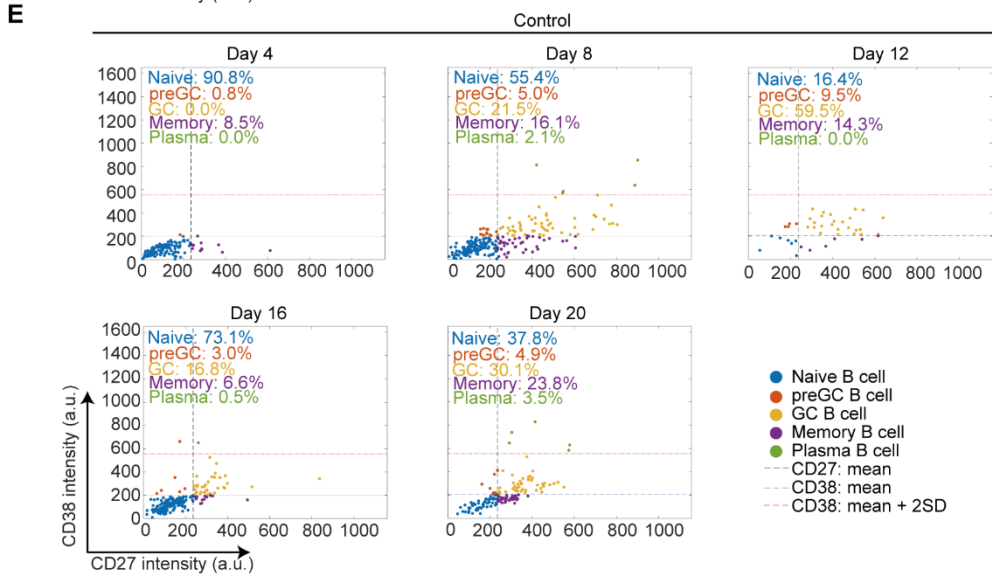

**Fig. S5. Quantitative classification of differentiated B cell subsets on chip based on CD27 and CD38 expression.** (A) Immunofluorescence images showing B cell subtype identification on chip by CD19, CD38, CD27, and DAPI 12 days after vaccination. (B-C) Quantitative classification of B cell subsets based on the CD27 and CD38 expression intensities on individual CD19<sup>+</sup> B cells. Histograms show distribution of CD27 and CD38 expression in pooled B cells from all 7 time points (days 0-12) compared to pooled negative controls (CD19<sup>-</sup> cells in the same fields of view). Data from all time points were combined to establish consistent thresholds. Dashed lines indicate the mean and mean + two standard deviations (2SD) of the pooled experimental data, which were used as gating thresholds to define B cell subpopulations at each time point. (D) Scatter plots of CD27 versus CD38 expressions on B cells at days 0 to 12 upon vaccination. Based on the gating thresholds established in A-C, B cells were classified into five subtypes: naïve B cells (CD27<sup>-</sup>CD38<sup>-</sup>), preGC B cells (CD27<sup>-</sup>CD38<sup>+</sup>), GC B cells (CD27<sup>+</sup>CD38<sup>+</sup>), memory B cells (CD27<sup>+</sup>CD38<sup>-</sup>), and plasma cells (CD27<sup>+</sup>CD38<sup>++</sup>). (E) Control chips analyzed using the same gating thresholds over the same time course.



**Fig. S6. Transcriptional and ligand–receptor features that distinguish high versus low vaccine responders.** scRNA-seq analysis (10x Genomics) was performed on chip cultures collected on day 10 post-vaccination from representative high- (D3), intermediate- (D7) and low-response (D9, D10) donors. **(A)** UMAP of all single cells colored by Seurat clusters (0–12). **(B)** Volcano plot comparing high/intermediate responders (D3, D7) versus low responders (D9, D10) across all cells after removing sex-associated genes. X-axis: average log<sub>2</sub> fold-change (High–Low); Y-axis:  $-\log_{10}$  adjusted P (FDR, Methods). Dots in red and blue, and grey colors denote genes up-regulated, down-regulated and no significant difference in high responders comparing to low responders, respectively. Selected labels highlight markers of antigen presentation (HLA-C, B2M) and translational machinery enriched in high responders, and inhibitory/lncRNA or processing genes (FCRL5, NEAT1, SNHG5, ERAP2) enriched in low responders. **(C–F)** Circular chord diagrams summarizing the cell-surface ligand–receptor (LR) catalogue measured by TotalSeq-A for each hashtag (D3, D7, D9, D10). Chords connect cognate LR pairs detected (interaction score defined in Methods); outer labels list representative ligands/receptors (colors are for visual grouping only). High/intermediate-responder samples (D3, D7) show greater representation of help/activation axes (e.g., ICOS–ICOSL, CD40–CD40LG, CXCL13–CXCR5, and IL-6–IL-6R), consistent with enhanced DC–T<sub>h</sub>–B cell cooperation. Low-responder samples (D9, D10) display relatively increased regulatory/checkpoint or TGFB-family interactions (e.g., CTLA4–CD86, TGFB–TGFB<sub>R</sub>), in line with attenuated effector programs. Only ligand–receptor interactions that passed the statistical significance threshold (FDR < 0.1) are shown in the chord diagrams.

### III. Supplementary Tables

| Participant | Gender | Age range | Race                   | Comorbidity                                                          | Age score | CSG | CIRS | Risk Group |
|-------------|--------|-----------|------------------------|----------------------------------------------------------------------|-----------|-----|------|------------|
| D1          | Male   | 30-39     | Black/African-American | None                                                                 |           |     |      | Low CIRS   |
| D2          | Female | 70-79     | White/Caucasian        | Depression                                                           | +         |     | +    | Low CIRS   |
| D3          | Female | 30-39     | Black/African-American | Bipolar disorder                                                     |           |     | +    | Low CIRS   |
| D4          | Female | 30-39     | White/Caucasian        | Anxiety                                                              |           |     |      | Low CIRS   |
| D5          | Male   | 60-69     | White/Caucasian        | HTN, hypercholesterolemia, Brain tumor (resolved)                    | +         | +   | ++   | Mid CIRS   |
| D6          | Male   | 70-79     | Black/African-American | BPH, COPD, HTN, prostate cancer (resolved), Hep C (resolved), reflux | +         | +   | ++   | Mid CIRS   |
| D7          | Male   | 30-39     | White/Caucasian        | HIV infection                                                        |           | +++ | +++  | High CIRS  |
| D8          | Male   | 70-79     | White/Caucasian        | CAD                                                                  | +         | +   | ++   | Mid CIRS   |
| D9          | Male   | 60-69     | White/Caucasian        | Obesity, osteoarthritis, ASHD, HTN, bariatric surgery, migraines     | +         | ++  | +++  | High CIRS  |
| D10         | Female | 20-29     | White/Caucasian        | Asthma                                                               |           | ++  | ++   | Mid CIRS   |
| D11         | Male   | 80-89     | White/Caucasian        | CKD, CAD, HTN, hyperlipidemia, arthritis, neuropathy, allergies      | +         | ++  | +++  | High CIRS  |
| D12         | Female | 40-49     | Asian                  | Ovarian                                                              |           |     |      | Low CIRS   |
| D13         | Male   | 30-39     | Asian                  | None                                                                 |           |     |      | Low CIRS   |

**Supplementary Table S1. Demographic and clinical characteristics of study participants, and CIRS stratification by age and comorbidity.** Age score (0–1): age <65 scored 0, age >65 scored 1. Comorbidity Severity Grade (CSG, 0–3) was determined based on the type and severity of chronic conditions recorded for each participant. Low risk: CSG = 0, no chronic disease or only mild, non-immunologic conditions such as anxiety, depression, bipolar disorder, or mild asthma without corticosteroid use. Moderate: CSG = 1, one cardiometabolic or organ-specific chronic condition, or a combination that is clinically stable without overt immunosuppression. High/Immunocompromised (CSG≥2): CSG = 2, multiple cardiometabolic or inflammatory comorbidities, or respiratory/renal disease requiring ongoing clinical management but without a defined severe immunodeficiency. CSG = 3, the presence of HIV infection, a well-established cause of systemic immune impairment. For each donor, the Composite Immuno-Risk Score (CIRS) was calculated as the sum of the age score and the CSG value. Donors were then stratified into three risk categories: Low risk: CIRS ≤ 1, Mid risk: CIRS = 2, High risk: CIRS = 3.

**Supplementary Table S2** The formulation of 2022–2023 seasonal influenza vaccine used for each trial participant.

| Participant | Vaccine Manufacturer                                      |
|-------------|-----------------------------------------------------------|
| Donor 1     | Fluad Quadrivalent Seqirus, Inc.                          |
| Donor 2     | Fluzone Quadrivalent Sanofi Pasteur, Inc.                 |
| Donor 3     | Flucelvax Quadrivalent Seqirus, Inc.                      |
| Donor 4     | Fluzone Quadrivalent Sanofi Pasteur, Inc.                 |
| Donor 5     | Fluzone Quadrivalent Sanofi Pasteur, Inc.                 |
| Donor 6     | Fluzone High Dose Quadrivalent Sanofi Pasteur, Inc        |
| Donor 7     | Fluzone Quadrivalent Sanofi Pasteur, Inc.                 |
| Donor 8     | Fluad Quad Seqirus, Inc                                   |
| Donor 9     | Fluzone High Dose Quadrivalent Sanofi Pasteur, Inc        |
| Donor 10    | FluLaval Quadrivalent ID Biomedical Corporation of Quebec |
| Donor 11    | Fluzone High Dose Quadrivalent Sanofi Pasteur, Inc        |
| Donor 12    | FluLaval Quadrivalent ID Biomedical Corporation of Quebec |
| Donor 13    | FluLaval Quadrivalent ID Biomedical Corporation of Quebec |

**Supplementary Table S3** Antigen panel used in the influenza/rubella bead-based multiplex influenza immunoassay, consisting of 23 influenza A/B HA and NA antigens and the Rubella virus E1/E2 control antigen.

| HA or NA                                           | Source                                      |
|----------------------------------------------------|---------------------------------------------|
| A/Wisconsin/588/2019; A/Victoria/2570/2020 (H1) HA | Annual Vaccine                              |
| A/Cambodia/e0826360/2020 (H3) HA                   | Annual Vaccine                              |
| B/Washington/02/2019 (Victoria lineage) HA         | Annual Vaccine                              |
| B/Phuket/3073/2013 (Yamagata lineage) HA           | Annual Vaccine                              |
| A/Darwin/9/2021 (H3) HA                            | Annual Vaccine                              |
| B/Austria/1359417/2021 (Victoria lineage) HA       | Annual Vaccine                              |
| A/Victoria/4897/2022 (H1) HA                       | Annual Vaccine                              |
| A/Brevig Mission/1/1918 (H1) HA                    | 1918 Pandemic                               |
| A/Japan/305/1957 (H2) HA                           | 1957 Pandemic                               |
| A/Hong Kong/1/1968 (H3) HA                         | 1968 Pandemic                               |
| A/California/04/2009 (H1) HA                       | 2009 Pandemic                               |
| A/Michigan/45/2015 (H1) HA                         | mRNA HA vaccine                             |
| A/Vietnam/1194/2004 (H5) HA                        | mRNA HA vaccine                             |
| A/Shanghai/1/2013 (H7) HA                          | mRNA HA vaccine                             |
| A/Florida HA                                       | Avian influenza (bird flu) outbreak isolate |
| A/Wisconsin/588/2019; A/Victoria/2570/2020 (N1) NA | Annual Vaccine                              |
| A/Cambodia/e0826360/2020 (N2) NA                   | Annual Vaccine                              |
| B/Washington/02/2019 (Victoria lineage) NA         | Annual Vaccine                              |
| B/Phuket/3073/2013 (Yamagata lineage) NA           | Annual Vaccine                              |
| A/Darwin/9/2021 (N2) NA                            | Annual Vaccine                              |
| B/Austria/1359417/2021 (Victoria lineage) NA       | Annual Vaccine                              |
| A/Victoria/4897/2022 (N1) NA                       | Annual Vaccine                              |
| A/Florida NA                                       | Avian influenza (bird flu) outbreak isolate |
| Rubella virus E1/E2 antigen                        | control                                     |

**Supplementary Table S4** Antibodies used for immunofluorescence staining of lymph node-on-a-chip and the human lymph node tissue, and used for flow cytometry profiling.

| Immunofluorescence staining of lymph node-on-a-chip |                      |          |        |                 |                          |
|-----------------------------------------------------|----------------------|----------|--------|-----------------|--------------------------|
| Antibody                                            | Fluorescence         | Dilution | Host   | Cat#            | Manufacturer             |
| DAPI                                                | Blue                 | 1 µg/mL  | -      | D1306           | Thermo Fisher Scientific |
| CD31                                                | FITC                 | 1:50     | Mouse  | 303104          | Biolegend                |
| CD157                                               | APC                  | 1:50     | Rat    | 382110          | Biolegend                |
| Podoplanin (PDPN)                                   | PE                   | 1:20     | Rat    | NBP203952JF549  | Novus Biologicals        |
| CCL19                                               | -                    | 1:100    | Rabbit | 13397-1-AP      | Thermo Fisher Scientific |
| CD11c                                               | FITC                 | 1:50     | Mouse  | 337214          | Biolegend                |
| CD86                                                | PE                   | 1:50     | Mouse  | 374205          | Biolegend                |
| CD3                                                 | APC                  | 1:50     | Mouse  | 317318          | Biolegend                |
| CD4                                                 | PE                   | 1:50     | Mouse  | 317410          | Biolegend                |
| CD8                                                 | FITC                 | 1:50     | Mouse  | 344704          | Biolegend                |
| CD3                                                 | PE                   | 1:50     | Mouse  | 317308          | Biolegend                |
| CD25                                                | APC                  | 1:50     | Mouse  | 302610          | Biolegend                |
| CD69                                                | PE                   | 1:50     | Mouse  | 310906          | Biolegend                |
| CD19                                                | FITC                 | 1:50     | Mouse  | 302206          | Biolegend                |
| CD138                                               | PE                   | 1:50     | Mouse  | 352305          | Biolegend                |
| CD19                                                | FITC                 | 1:50     | Mouse  | 302206          | Biolegend                |
| CD27                                                | FITC                 | 1:50     | Mouse  | 356404          | Biolegend                |
| CD38                                                | Brilliant Violet 421 | 1:50     | Mouse  | 356618          | Biolegend                |
| CD19                                                | APC                  | 1:50     | Mouse  | 302212          | Biolegend                |
| BCL6                                                | APC                  | 1:50     | Rat    | 358505          | Biolegend                |
| IgD                                                 | Alexa Fluor 647      | 1:50     | Mouse  | 324503          | Biolegend                |
| Ki-67                                               | FITC                 | 1:50     | Mouse  | 350508          | Biolegend                |
| FOXP3                                               | Brilliant Violet 421 | 1:50     | Mouse  | 320123          | Biolegend                |
| CXCR5                                               | Brilliant Violet 421 | 1:50     | Mouse  | 145511          | Biolegend                |
| Laminin                                             | DyLight488           | 1:100    | Mouse  | PA5-22901       | Thermo Fisher Scientific |
| Fibronectin                                         | PE                   | 1:50     | Mouse  | IC1918P         | R&D Systems              |
| Collagen IV                                         | Alexa Fluor 647      | 1:50     | Mouse  | 51-9871-80      | Biolegend                |
| Goat anti-rabbit secondary antibody                 | Alexa Fluor 488      | 1:500    | Goat   | A11008          | invitrogen               |
| Immunofluorescence staining of lymph node tissue    |                      |          |        |                 |                          |
| CD3e                                                | Alexa Fluor 488      | 1:100    | Mouse  | 300415          | Biolegend                |
| PAX5                                                | Alexa Fluor 594      | 1:100    | Rabbit | NBP2-22157AF594 | Novus Biologicals        |
| aSMA                                                | Alexa Fluor 405      | 1:100    | Mouse  | 53-9760-82      | Thermo Fisher            |
| CD31                                                | Alexa Fluor 555      | 1:50     | Mouse  | 303116          | Biolegend                |
| CD163                                               | Alexa Fluor 647      | 1:50     | Mouse  | 333622          | Biolegend                |
| HLA-DR                                              | Alexa Fluor 488      | 1:50     | Mouse  | 307640          | Biolegend                |

| Flow cytometry |                     |      |       |                |                          |
|----------------|---------------------|------|-------|----------------|--------------------------|
| 7-AAD          | DNA dye             | 1:20 | -     | CAT#00-6993-50 | Thermo Fisher Scientific |
| CD3            | APC                 | 1:50 | Mouse | 317318         | Biolegend                |
| CD4            | PE                  | 1:50 | Mouse | 317410         | Biolegend                |
| CD8            | FITC                | 1:50 | Mouse | 344704         | Biolegend                |
| CD25           | PE/Cyanine7         | 1:50 | Mouse | 302611         | Biolegend                |
| CXCR5          | Brilliant Viole 421 | 1:50 | Mouse | 145511         | Biolegend                |
| FOXP3          | Alexa Fluor 647     | 1:50 | Mouse | 320213         | Biolegend                |
| CD19           | BV510               | 1:50 | Mouse | 302241         | Biolegend                |
| HLA-DR         | FITC                | 1:50 | Mouse | 327005         | Biolegend                |
| CD80           | PE/Cyanine7         | 1:50 | Mouse | 305217         | Biolegend                |
| CCR7           | Alexa Fluor 647     | 1:50 | Mouse | 353217         | Biolegend                |
| CD209          | Brilliant Viole 421 | 1:50 | Mouse | 330117         | Biolegend                |
| CD1a           | PE                  | 1:50 | Mouse | 300106         | Biolegend                |
| CD11c          | APC/Cyanine         | 1:50 | Mouse | 337217         | Biolegend                |
